# Supplementary material for: Bipolymeric Pectin Millibeads Doped with Functional Polymers as Matrices for the Controlled and Targeted Release of Mesalazine
Source: PubMed Central journal article supplement (PMC7731135; doi:10.3390/molecules25235711), 2020-12-03
Supplement: molecules-25-05711-s001.pdf [file molecules-25-05711-s001.pdf]

## Supplementary materials

**Table S1.** The values of Tukey's HSD test obtained for the comparison of diameter wet beads (HSD=0.146).

|     | F1    | F2    | F3    | F4    | F5    | F6    | F7    | F8    | F9    | F10   |
|-----|-------|-------|-------|-------|-------|-------|-------|-------|-------|-------|
| F1  | 0.000 | 0.190 | 0.160 | 0.150 | 0.150 | 0.280 | 0.340 | 0.350 | 0.360 | 0.340 |
| F2  |       | 0.000 | 0.030 | 0.040 | 0.040 | 0.090 | 0.150 | 0.160 | 0.170 | 0.150 |
| F3  |       |       | 0.000 | 0.010 | 0.010 | 0.120 | 0.180 | 0.190 | 0.200 | 0.180 |
| F4  |       |       |       | 0.000 | 0.000 | 0.130 | 0.190 | 0.200 | 0.210 | 0.190 |
| F5  |       |       |       |       | 0.000 | 0.130 | 0.190 | 0.200 | 0.210 | 0.190 |
| F6  |       |       |       |       |       | 0.000 | 0.060 | 0.070 | 0.080 | 0.060 |
| F7  |       |       |       |       |       |       | 0.000 | 0.010 | 0.020 | 0.000 |
| F8  |       |       |       |       |       |       |       | 0.000 | 0.010 | 0.010 |
| F9  |       |       |       |       |       |       |       |       | 0.000 | 0.020 |
| F10 |       |       |       |       |       |       |       |       |       | 0.000 |

**Table S2.** The values of Tukey's HSD test obtained for the comparison of diameter dry beads (HSD=0.127).

|     | F1 | F2    | F3    | F4    | F5    | F6    | F7    | F8    | F9    | F10   |
|-----|----|-------|-------|-------|-------|-------|-------|-------|-------|-------|
| F1  | 0  | 0.013 | 0.003 | 0.054 | 0.024 | 0.174 | 0.164 | 0.164 | 0.179 | 0.120 |
| F2  |    | 0.000 | 0.010 | 0.067 | 0.037 | 0.187 | 0.177 | 0.177 | 0.192 | 0.133 |
| F3  |    |       | 0.000 | 0.058 | 0.027 | 0.178 | 0.167 | 0.167 | 0.182 | 0.124 |
| F4  |    |       |       | 0.000 | 0.030 | 0.120 | 0.110 | 0.110 | 0.124 | 0.066 |
| F5  |    |       |       |       | 0.000 | 0.150 | 0.140 | 0.140 | 0.155 | 0.097 |
| F6  |    |       |       |       |       | 0.000 | 0.010 | 0.010 | 0.004 | 0.054 |
| F7  |    |       |       |       |       |       | 0.000 | 0.000 | 0.015 | 0.044 |
| F8  |    |       |       |       |       |       |       | 0.000 | 0.015 | 0.044 |
| F9  |    |       |       |       |       |       |       |       | 0.000 | 0.058 |
| F10 |    |       |       |       |       |       |       |       |       | 0.000 |

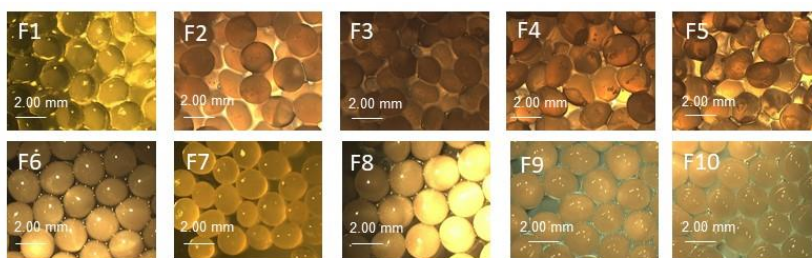

**Figure S1.** The microscopic images of all formulations studied.

**Table S3.** The mean diameter of wet and dry beads of formulations F1–F10

|                                 | F1            | F2            | F3            | F4            | F5            | F6            | F7            | F8            | F9            | F10           |
|---------------------------------|---------------|---------------|---------------|---------------|---------------|---------------|---------------|---------------|---------------|---------------|
| Mean diameter of wet beads [mm] | 1.47<br>±0.21 | 1.66<br>±0.15 | 1.63<br>±0.15 | 1.62<br>±0.18 | 1.62<br>±0.20 | 1.75<br>±0.20 | 1.81<br>±0.29 | 1.82<br>±0.20 | 1.83<br>±0.30 | 1.81<br>±0.30 |
| Mean diameter of dry beads [mm] | 0.85<br>±0.18 | 0.82<br>±0.14 | 0.82<br>±0.14 | 0.86<br>±0.13 | 0.83<br>±0.14 | 0.99<br>±0.22 | 1.03<br>±0.20 | 0.98<br>±0.22 | 0.98<br>±0.18 | 0.92<br>±0.15 |

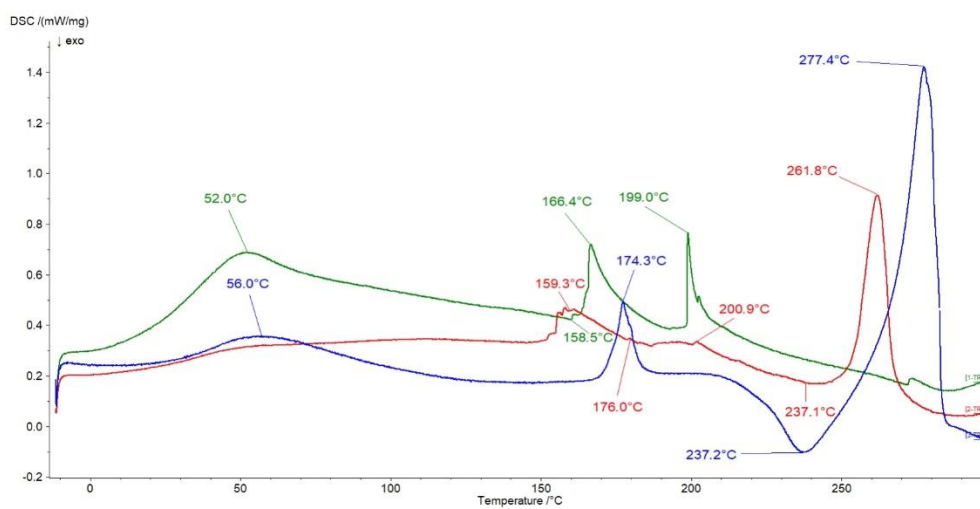

**Figure S2.** The DSC thermograms of F1 (green line), F6 (red line) and physical mixture of F6 (blue line).
